# Supplementary material for: A binder-free method to produce heat-sealable and transparent cellulose films driven by a confined green solvent
Source: Royal Society of Chemistry journal article supplement (doi:10.1039/d2gc04655e), 2023-01-01
Supplement: d2gc04655e1.pdf [file d2gc04655e1.pdf]

***A Binder-free Method to Produce Heat-sealable and Transparent Cellulose Films Driven by  
Confined Green Solvent***

*Chengling Huang<sup>a</sup>, Hou-Yong Yu<sup>\*,a</sup>, Lumin Chen<sup>a</sup>, Bin Xue<sup>a</sup>, Yunfei Shen<sup>b</sup>, Jiayuan Shen<sup>b</sup>, Kam Chiu  
Tam<sup>c</sup>*

a Key Laboratory of Intelligent Textile and Flexible Interconnection of Zhejiang Province, Zhejiang  
Sci-Tech University, Hangzhou 310018, China

b Huzhou City Linghu Xinwang Chemical Co., Ltd, Huzhou 313018, China

c Department of Chemical Engineering, Waterloo Institute for Nanotechnology, University of  
Waterloo, 200 University Avenue West, Waterloo, Ontario, N2L 3G1, Canada

**Table S1.** The DP of cotton and cellulose film.

| Sample         | $t/s$      | $t_0/s$ | $\eta_{sp}$     | DP            |
|----------------|------------|---------|-----------------|---------------|
| cotton         | $96 \pm 2$ | 55      | $0.75 \pm 0.03$ | $1643 \pm 54$ |
| cellulose film | $85 \pm 1$ | 55      | $0.55 \pm 0.01$ | $632 \pm 10$  |

**Table S2.** The total weight concentration of elements Zn and Cl in the cellulose films after 35, 40, 45, 50, 55, and 60 min of residual solvent restriction.

| Sample | Element- Zn and Cl (%) <sup>a</sup> |        |        |        |        |        |
|--------|-------------------------------------|--------|--------|--------|--------|--------|
|        | 35 min                              | 40 min | 45 min | 50 min | 55 min | 60 min |
| CF-0   | 28.43                               | 20.29  | 11.27  | 8.84   | 5.84   | 5.23   |
| CF-15  | 34.92                               | 28.11  | 22.32  | 15.84  | 13.10  | 12.21  |

<sup>a</sup> The total weight concentration of elements Zn and Cl in the cellulose films.

**Table S3.** The initial water, initial ZnCl<sub>2</sub>, and initial co-mixing agent weight before solvent restriction, and residual weight of CF-0, CF-10, CF-15, and CF-20 after solvent restriction.

| Sample                             | CF-0          | CF-10         | CF-15         | CF-20          |
|------------------------------------|---------------|---------------|---------------|----------------|
| Initial water weight/g             | 5.6           | 5.6           | 5.6           | 5.6            |
| Initial ZnCl <sub>2</sub> weight/g | 14.0          | 14.0          | 14.0          | 14.0           |
| Initial co-mixing agent weight/g   | 0.0           | 2.0           | 3.0           | 4.0            |
| Residual Weight/g                  | $8.9 \pm 0.1$ | $9.4 \pm 0.3$ | $9.6 \pm 0.1$ | $10.0 \pm 0.2$ |

**Table S4.** The percentage of cellulose, ZnCl<sub>2</sub>, glycerol, sorbitol, and ethanol/water in the air-dried films.

| Components | cellulose | ZnCl <sub>2</sub> | water | Co-mixing agent |
|------------|-----------|-------------------|-------|-----------------|
| CF-10      | 45        | 32                | 12    | 11              |
| CF-15      | 46        | 27                | 15    | 12              |
| CF-20      | 42        | 32                | 12    | 14              |

**Table S5.** The residual weight of CF-0, CF-10, CF-15, and CF-20 after solvent restriction and the recycling efficiency of solvents from the residual products.

| Sample                             | CF-0       | CF-10      | CF-15      | CF-20      |
|------------------------------------|------------|------------|------------|------------|
| Initial ZnCl <sub>2</sub> weight/g | 14.0       | 14.0       | 14.0       | 14.0       |
| Residual Weight/g                  | 8.9 ± 0.1  | 9.4 ± 0.2  | 9.6 ± 0.1  | 10.0 ± 0.2 |
| Recycling efficiency/%             | 63.5 ± 0.8 | 67.1 ± 1.5 | 68.6 ± 0.7 | 71.4 ± 1.5 |

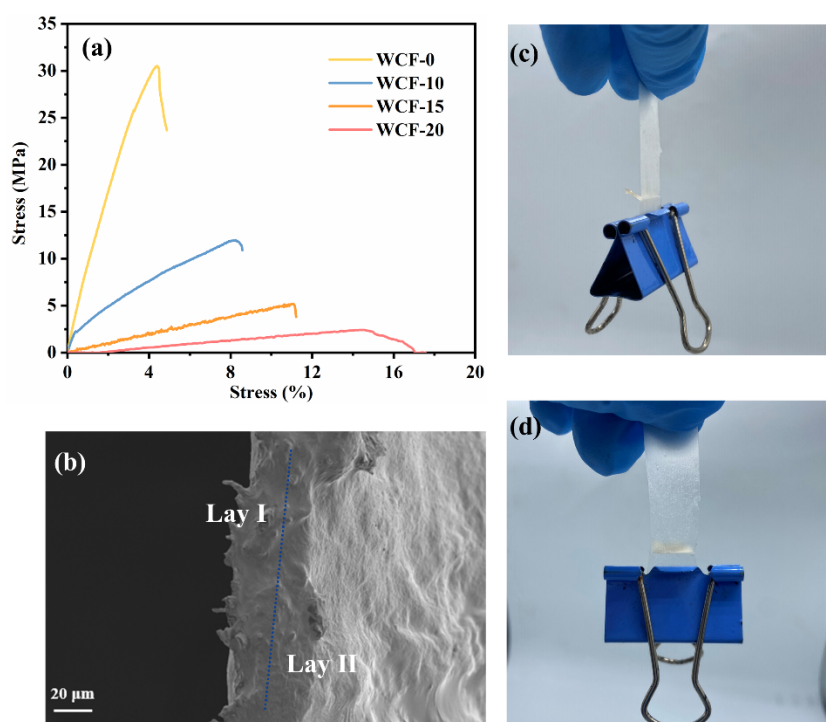

**Figure S1.** (a) The mechanical performance of WCF-0, WCF-10, WCF-15, and WCF-20 films, (b) the sectional SEM picture of WCF-15 after self-bonded, and (c, d) the actual pictures of WCF-15 films after self-bonded.

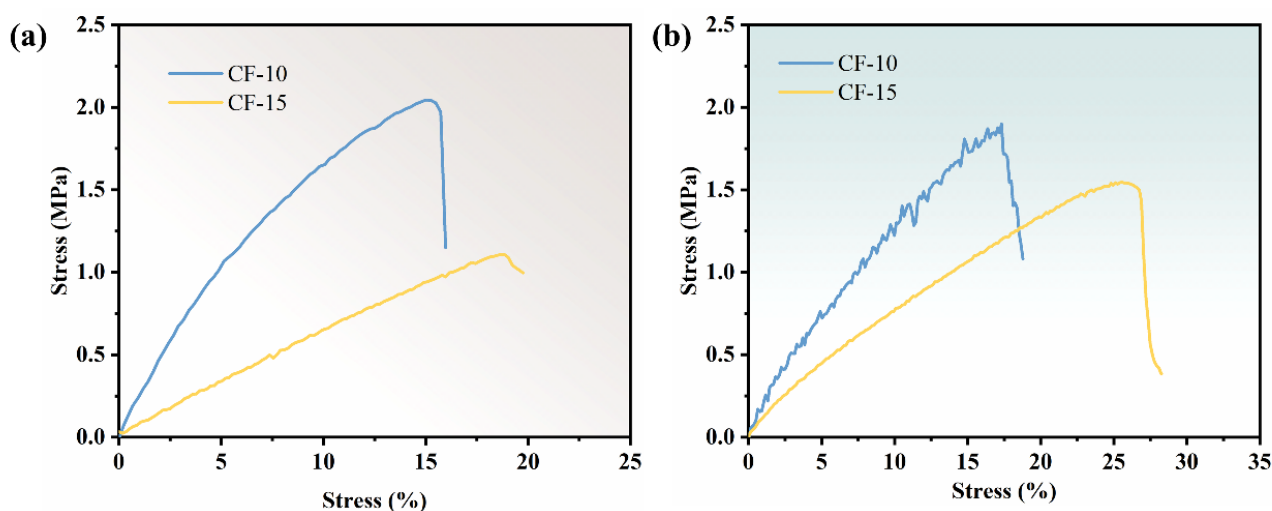

**Figure S2.** The mechanical performance of CF-10 and CF-15 films (a) after water soaking for at least 30 min and (b) in a 65% humidity environment for at least 12 h.

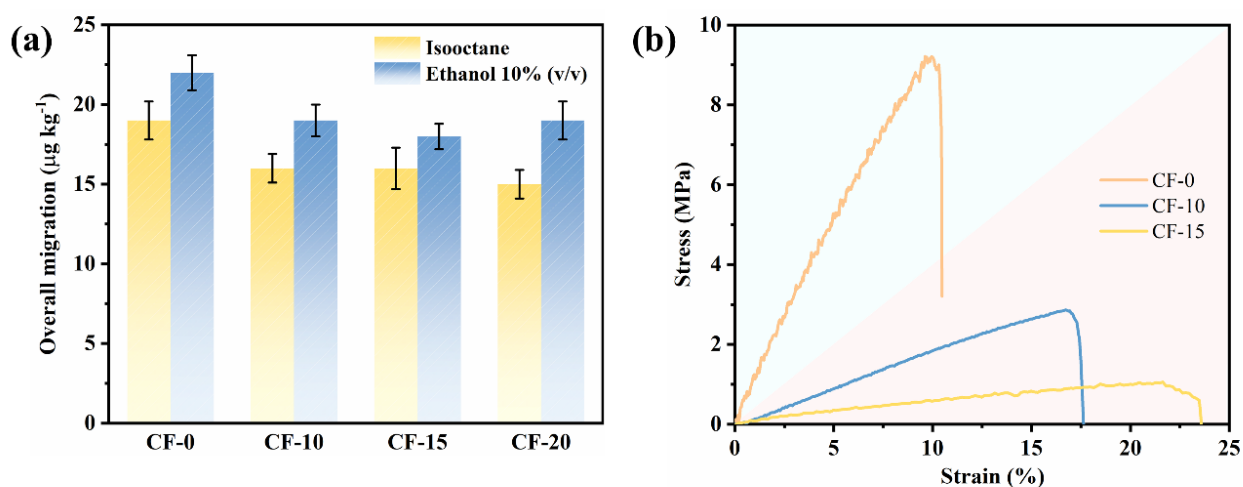

**Figure S3.** (a) Overall migration data in ethanol 10%(v/v) and isooctane and (b) mechanical performance of cellulose films for storing at ambient conditions for more than six months.

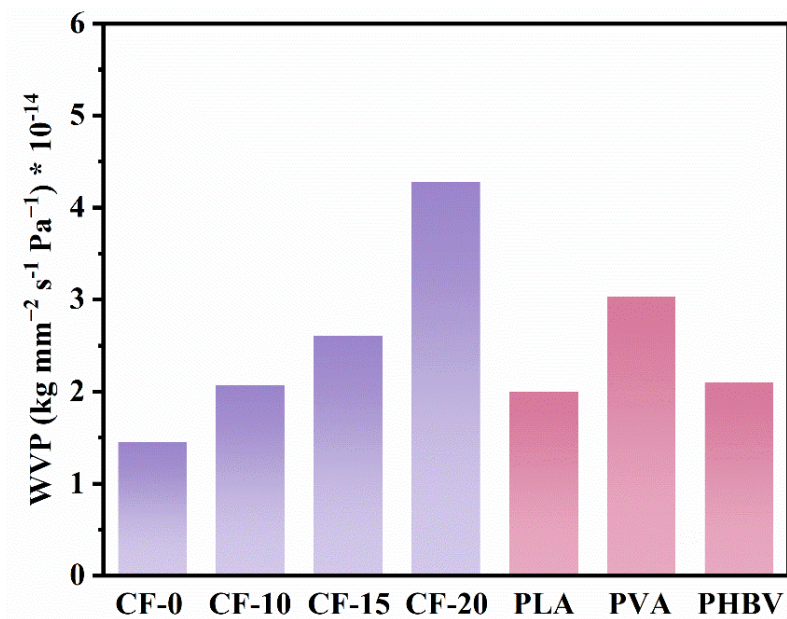

Figure S4. Water vapor permeability (WVP) of CF-0, CF-10, CF-15, CF-20, PLA<sup>1</sup>, PVA<sup>2</sup>, and PHBV<sup>3</sup> films.

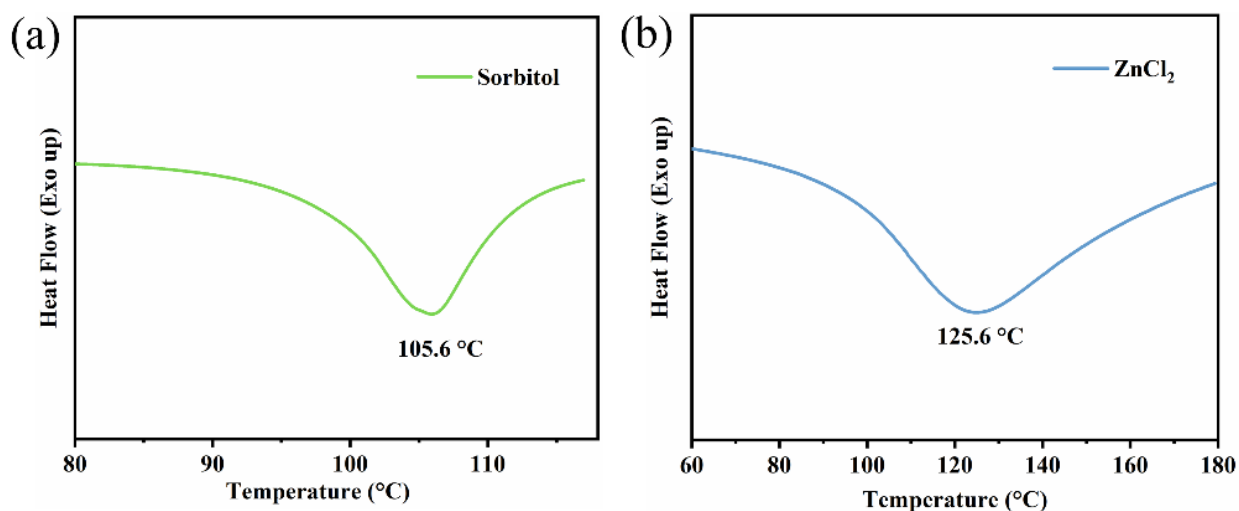

Figure S5. DSC curves of (a) sorbitol, (b) ZnCl<sub>2</sub>.

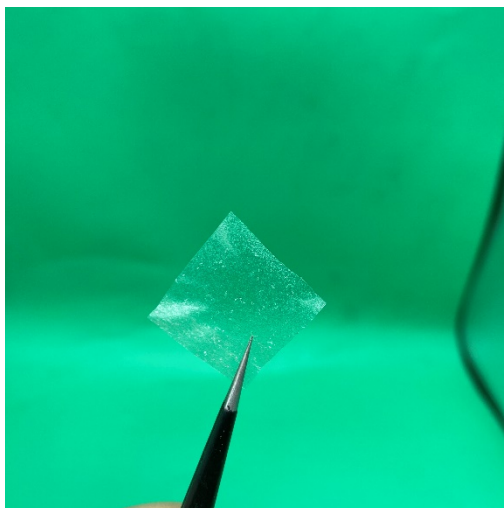

Figure S6. The cellulose film fabricated by the recycled  $\text{ZnCl}_2$ .

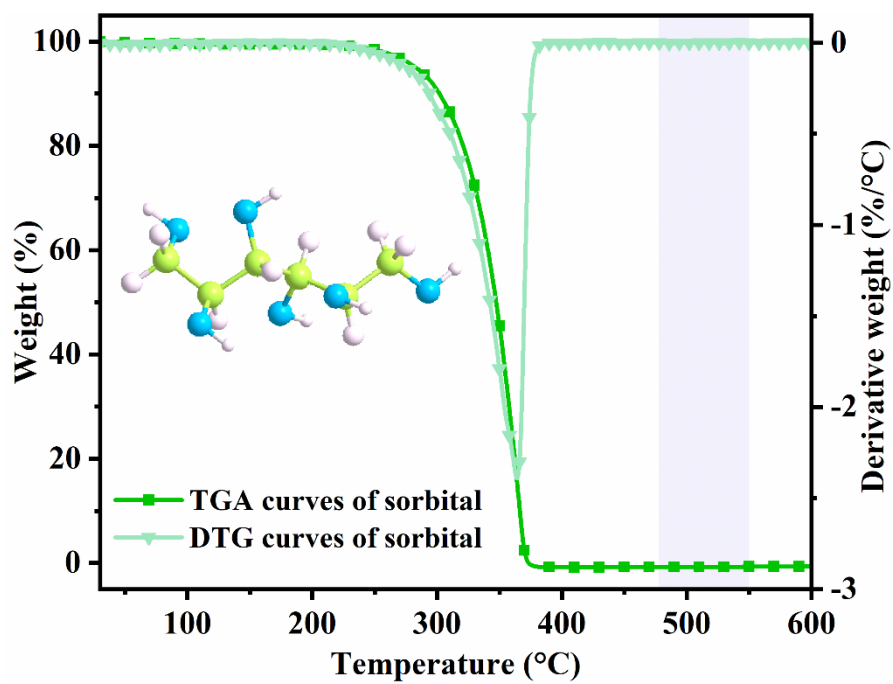

Figure S7. TGA and DTG curves of sorbitol

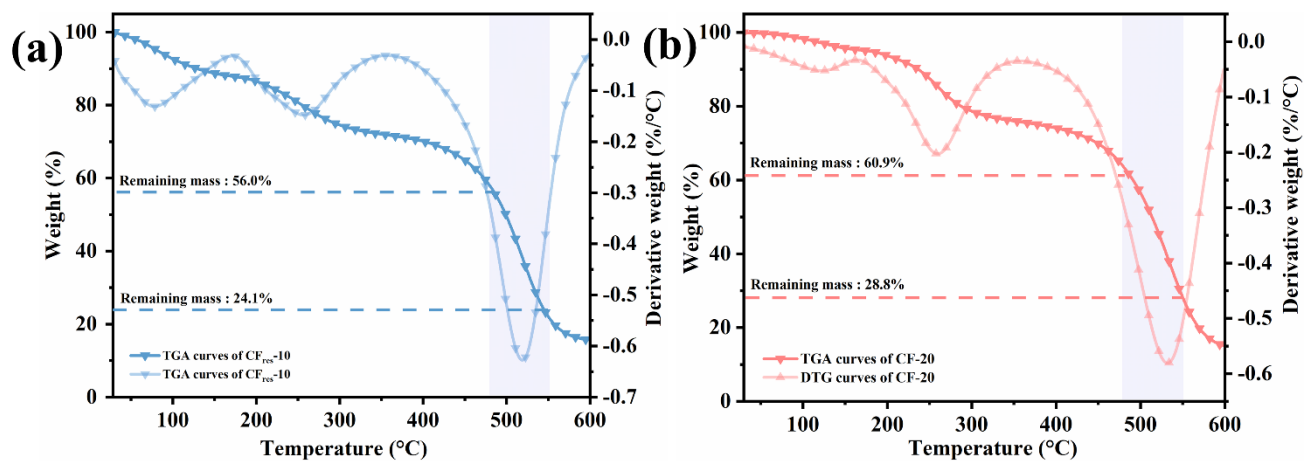

**Figure S8.** TGA and DTG curves of (a) CF<sub>res</sub>-10 and (b) CF<sub>res</sub>-20

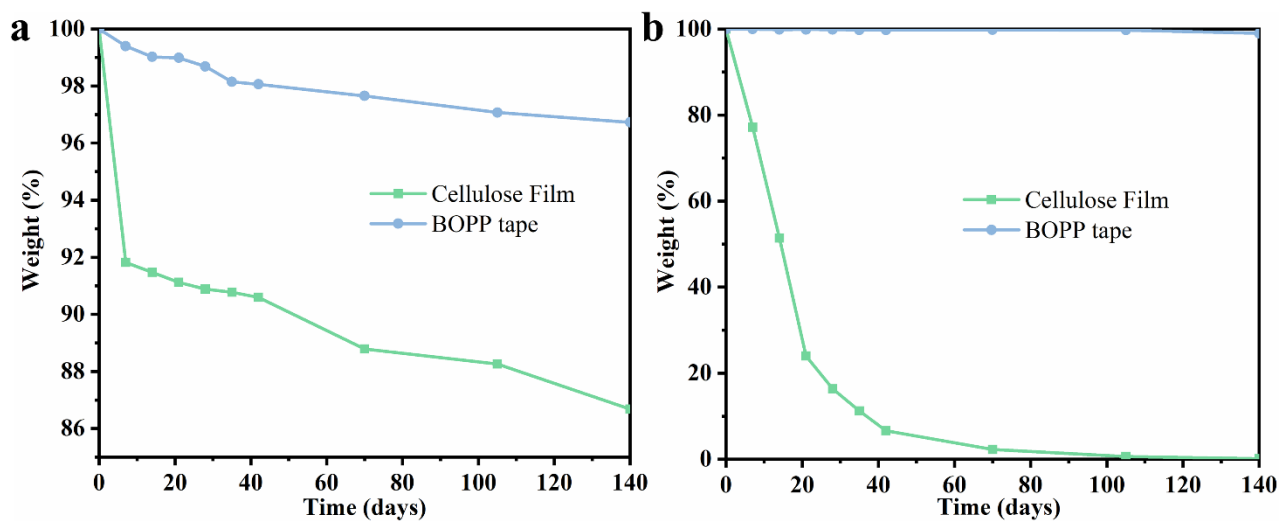

**Figure S9.** Weight loss curves of the cellulose film and BOPP tape in (a) hydrolytic and (b) soil degradation<sup>4</sup>.

## References

- 1 H. Y. Yu, H. Zhang, S. Y. H. Abdalkarim, L. Yang, J. Zhu, J. Gu and J. Yao, *J. Taiwan Inst. Chem. Eng.*, 2019, **95**, 583–593.
- 2 J. Chen, M. Zheng, K. B. Tan, J. Lin, M. Chen and Y. Zhu, *Int. J. Biol. Macromol.*, 2022, **212**, 402–411.
- 3 F. Li, H. Y. Yu, Y. Y. Wang, Y. Zhou, H. Zhang, J. M. Yao, S. Y. H. Abdalkarim and K. C. Tam, *J. Agric. Food Chem.*, 2019, **67**, 10954–10967.
- 4 C. Huang, Y. Liao, Z. Zou, Y. Chen, M. Jin, J. Zhu, S. Y. Hussain Abdalkarim, Y. Zhou and H. Y. Yu, *J. Clean. Prod.*, 2022, **355**, 131757.
